# Supplementary material
Source: ML conference proceedings conference paper supplement (https://openreview.net/forum?id=nQZHEunntbJ)
Supplement: supplementary_material [file attachment]

Hosting, Maintenance and Licensing

For AutoWS-Bench-101

# Hosting

- Hosting platform for datasets: **Google Drive**;hosting platform for code: **GitHub**
- GitHub URL: <https://github.com/Sala-Group/AutoWS-Bench-101>

The datasets are downloaded automatically from Google Drive using our code. In the near future, we plan to move all of the datasets to a longer-term Google Drive --- the download links in our code on GitHub will be updated to reflect this.

# Maintenance and Long-Term Preservation

We believe that these platforms are long-lasting, and would maintain service indefinitely. There is no cost from using GitHub. Once we migrate the dataset to the shared drive, data preservation is also cost-free as it is sponsored by UW-Madison.

# Licensing

All datasets that we have been modified for our purposes have inherited the license from their source.
