# Supplementary material
Source: ML conference proceedings conference paper supplement (https://openreview.net/forum?id=nQZHEunntbJ)
Supplement: supplementary_material [file attachment]

# Author Statement

We, the authors of AutoWS-Bench-101, confirm that we will bear all responsibilities in the situation of violation of rights caused by our work and its included datasets. We have not introduced new datasets, although we have introduced modifications of existing datasets.

Signature: Nicholas Roberts

Date: 10/12/2022
